# Supplementary material for: Distribution of benthic megafauna in the Barents Sea: baseline for an ecosystem approach to management
Source: Oxford University Press journal article supplement (doi:10.1093/icesjms/fsu106), 2014-07-02
Supplement: fsu106supp.doc [file fsu106supp.doc]

**APPENDIX 1: The 19 local areas within the Barents Sea**

The 19 local areas are described below in order to provide detailed information for each of the four regions SW, SE, NW and NE. This is done in order to establish a baseline from where characteristic features can be followed by the long-term monitoring series in progress. The detailed information on each local area is summarized in Tables 2 and 3.

**The SW region**

SW-1 - Stations in this subarea are located on the Tromso Plateau and along the Norwegian and Russian coasts east to Cape Kanin (Fig. 5, red squares). The stations are moderately deep (mean 242 m) and covered with Atlantic water of high temperature and salinity (means of 4.8 oC and 35.11). The epibenthic biomass is relatively high and dominated by sponges (*Geodia barretti* and *G. macandrewii*), the introduced red king crab (*Paralithodes* *camtschaticus*) and the boreal Galatheidae *Munida bamffica*.

SW-2 - Stations in this group are located along the upper slope and the outer Bear Island Channel at the western entrance to the Barents Sea, extending north along the slope to off western Spitsbergen (Fig. 5, red circles). The stations are located deeper (mean 383 m) than area 1, and with Atlantic water of lower temperature and salinity. The biomass (1.9 kg haul-1) was on average lower than in subarea 1, but dominated by the same *Geodia* species. along with other sponges (*Polymastia* sp.) and the sea star *Solaster endeca*.

SW-3 - Stations are located on the deep North Cape Bank (mean depth 312 m, Fig. 5, red diamonds) covered with warm and saline Atlantic water of the inflowing current branch (North Cape Current; means of 4.6ºC and 35.13). The epibenthic biomass was high with a mean of 84 kg per haul (maximum of 339 kg) and dominated by the same two Geodia species (97% of total biomass) as in local areas 1 and 2, but along with other sponges (*Thenea muricata*) and the boreal sea cucumber *Parastichopus tremulus*.

SW-4 - Stations in this group are located in the deep waters of the Bear Island Channel (mean depth 378 m, Fig. 5, red triangles) and north and east of the North Cape Bank area with inflowing Atlantic water (mean temperature 2.4oC and mean salinity 35.09). The biomass was relatively low (mean 3 kg haul-1) compared to the areas above, and dominated by the sea cucumber *Molpadia borealis*, sponges (the two *Geodia* species and *Thenea muricata*), and *Ctenodiscus crispatus*.

**The SE region**

SE-5 - Stations in this subarea are located along the slopes of banks off southwestern Novaya Zemlya (Fig. 5, yellow squares). The depths varied between 38 and 330 m, and the bottoms were covered by relatively cold modified Atlantic water (mean temperature 0.8oC and salinity 34.84). The biomass was low (mean 1.2 kg haul-1) and dominated by snow crab, sea urchins (*Strongylocentrotus* spp.), the shrimp *Sabinea* *septemcarinata*, and sea stars (*Solaster* sp. and *Ctenodiscus crispatus*).

SE-6 - Stations are located on and around Murman Rise at moderate depths (107-309 m, Fig. 5, yellow diamonds) overlain by modified Atlantic water (mean temperature and salinity 2.4oC and 34.9). The biomass was low (0.9 kg haul-1) and dominated by sponges (*Suberites* sp. and undetermined), the sea star *Hippasteria phrygiana*, and sea anemones (*Hormathia* sp. and undetermined).

SE-7 - This group of stations is split in two areas; the majority of stations are located in relatively shallow water in the southern and eastern Pechora Sea, while 3 stations are located in deeper water along the Storfjord trench between Svalbard and the Svalbard Bank (Fig. 5, yellow crosses). The waters are coastal and Atlantic with temperatures from 0.4 to 4.2ºC and salinities from 33.4 to 35.1. The epifauna biomass was the lowest recorded in this study with an average of only 0.2 kg haul-1, and was dominated by crustaceans such as the crangonids *Sabinea septemcarinata* and *Sclerocrangon ferox*, the snow crab, and the banacle *Balanus* sp, and also by the sea urchins *Strongylocentrotus* spp.

SE-8 - Stations in this group are located in the Kanin Bank area at depths ranging from 87 to 387 m (Fig. 5, yellow triangles on side). The water is mostly cooled Atlantic water with temperatures of 0.2-2.5ºC and salinities of 34.8 or higher. The number of species was the lowest recorded and the biomass was low (mean 1.2 kg haul-1) and totally dominated by the sea stars *Icasterias panopla* and *Urasteria linckii*, the sea cucumber *Cucumaria frondosa*, sponges and the bivalve *Chlamys islandica*.

SE-9 - While grouping in the SE region, the stations in subarea 9 are located on the western and northern shelf of Svalbard at a mean depth of 305 m (Fig. 5, yellow triangles). The waters here are Atlantic or modified Atlantic water with temperatures of 0.5-6.4ºC and salinities of 34.8 or higher. The biomass was moderate (up to 38 kg haul-1) and dominated by sponges (undetermined, Phakellia sp., *Geodia baretti and Haliclona sp.*) and sea urchins (*Strongylocentrotus* spp.).

SE-10 - Stations in this group occurred scattered in the southeastern Barents Sea along edges of banks and also on the Svalbard Bank at relatively shallow depths ranging from 43 to 179 m (Fig. 5, yellow circles). The hydrographic conditions varied with temperatures ranging between -0.7 and 5.5 oC and salinities from 33.6 to 34.9. The epifauna biomass was relatively high (mean 19.6 kg haul-1) and dominated by filtrating organisms including the sea cucumber *Cucumaria frondosa*, the bivalve *Chlamys islandica* and sponges.

**The NW region**

NW-11 - Stations in this area are located in the Hopen Deep and in the region of the deep banks south of the Central Bank. There are also some stations located in the Storfjord Trench included in this subarea (Fig. 5, green squares). The stations are located at depths of 129-370 m and are covered by Atlantic or modified Atlantic water (temperature -0.5-3.6oC; salinities 34.8-35.1). The biomass was generally low (0.3-8 kg haul-1) and dominated by sea stars (*Ctenodiscus crispatus*, *Icasterias panopla*), the sea cucumber *Molpadia borealis*, and the shrimp *Sabinea septemcarinata*.

NW-12 - Stations in this subarea had a discontinuous distribution in the NW region, being found on the Central Bank, on the eastern margins of the Great Bank, around Kong Karls Land, and on a few more locations along eastern Svalbard (Fig. 5, green triangles). They were located at relatively shallow depths (92-226 m) and covered with Arctic or modified Atlantic water (temperature -1.4-3.4 oC, salinity 33.9-35.0). This local area had the highest number of species. The biomass was moderate (0.9-32 kg haul-1) and dominated by sea urchins (*Strongylocentrotus* spp.), the brittle star *Gorgonocephalus eucnemis*, the shrimp *Sabinea septemcarinata*, the sea lily *Heliometra glacialis*,and the sea star *Urasterias linckii*.

NW-13 - Stations are located in coastal waters in western and northern Spitsbergen and around northern and eastern Nordaustlandet (Fig. 5, green diamonds). The depths ranged from 133 to 432 m and the stations were covered by Arctic to Atlantic waters (temperatures -0.8-3.5 oC; salinities 34.4-35.0). The biomass was moderate (0.5-32 kg haul-1) and dominated by echinoderms including sea stars (*Ctenodiscus crispatus*, *Icasterias panopla*), brittle stars (*Gorgonocephalus arcticus*, *Ophiura sarsi*), and sea urchins (*Strongylocentrotus* spp.).

NW-14 - Stations in this subarea are located on the Great Bank and in the Olga Deep area including the waters between Kong Karls Land and Kvitøya (Fig. 5, green circles). The depths at the stations ranged from 74 to 360 m and the waters varied from Arctic to modified Atlantic (temperatures -0.8-3.5, salinities 34.4-35.8). The epifauna biomass was relatively low (0.3-15 kg per trawl) and dominated by brittle stars (*Gorgonocephalus* spp.), the bryozoan *Alcyonidium* sp., the sea star *Ctenodiscus crispatus*, and the sea cucumber *Molpadia borealis*.

**The NE region**

NE-15 - Stations in this region are located in the South East Basin area extending north to about 76ºN (Fig. 5, blue squares). The stations were mostly deep (mean depth 298 m) and covered by modified Atlantic water (temperatures -0.1-2.4oC, salinities 34.9-35.0). The epifauna biomass was moderate (1.2-46 kg haul-1) and dominated by the polychaete *Spiochaetopterus arcticus*, sponges, snow crab, the sea cucumber *Molpadia borealis*, and the shrimp *Sabinea septemcarinata*.

NE-16 - Stations in this subarea are located on the Novaya Zemlya Bank across to the eastern flank of the Central Bank and also in the deep area of the northern Pechora Sea (Fig. 5, blue triangles). The depths at the stations varied from 114 to 310 m and were covered by modified Atlantic water (temperatures -1.0-2.4oC, salinities 34.9-35.0). The biomass was generally high (mean 70.6 kg haul-1) and was dominated by sponges (undetermined), sea urchins (*Strongylocentrotus* spp.), snow crab, and the shrimp *Sabinea septemcarinata*.

NE-17 - While grouped in the NE region, the four stations in this subarea were located on the deep slope north of Svalbard at 617-928 m and covered with modified Atlantic water (temperatures -0.7-2.2 oC, salinities 34.9-35.0) (Fig. 5, blue triangles on side). The biomass was low (1-2 kg haul-1) and almost totally dominated by *Gorgonocephalus* brittle stars, but also the crangonid crustacean *Sclerocrangon ferox* and the sponge *Geodia macandrewii*.

NE-18 - Stations in this subarea are located in the St. Anna Trough in the northern Kara Sea. There are also a few stations located in the northwestern Franz-Victoria Trough included in this subarea (Fig. 5, blue circles). The stations are relatively deep (452-636 m) and covered with modified Atlantic water (temperatures 0.3-1.1 oC, salinities 34.9). The epifauna biomass was moderate (mean 8.2 kg haul-1) and dominated by the sea pen *Umbellula encrinus* and brittle stars (*Ophiopleura borealis* and *Gorgonocephalus arcticus*).

NE-19 - Stations in this subarea are located in a broad area in the northeastern Barents Sea south from Franz-Victoria Trough between Victoria Island and Franz Josef Islands to about 76oN. The subarea also included stations located in the southern and eastern St. Anna Trough in the adjacent northern Kara Sea (Fig. 5, blue diamonds). The stations were located in relatively deep water (mean depth 288 m) and covered with Arctic or modified Atlantic waters (temperatures -0.9-2.1 oC, salinities 34.6-34.9). The epifauna biomass was high (57-329 kg haul-1) and dominated by sponges (undetermined) and brittle stars (*Ophiacantha bidentata*, *Gorgonocephalus arcticus* and *Ophiopleura borealis*).
